# Supplementary material for: Cognitive and Emotional Impairment after Minor Stroke and Non-ST-Elevation Myocardial Infarction (NSTEMI): A Prevalence Study
Source: Hindawi journal article supplement (doi:10.1155/2019/2527384), 2019-04-01
Supplement: f1 [file 2527384.f1.pdf]

# Cognitive and emotional impairment after minor stroke and non-ST-elevation myocardial infarction (NSTEMI). A prevalence study.

## Supplementary material

**Table i. Chi square test of gender differences in risk factors\*, cognitive tests, HADS and FSS in minor stroke and NSTEMI patients**

|                                             | Male pat (%)<br>n=186 | Female pat (%)<br>n=102 | p   | Male cont (%)<br>n= 113 | Female cont (%)<br>n=31 | p    |
|---------------------------------------------|-----------------------|-------------------------|-----|-------------------------|-------------------------|------|
| Hypertension <sup>a</sup>                   | 114 (56)              | 59 (49)                 | .2  | 58 (51)                 | 11 (35)                 | .002 |
| Diabetes mellitus                           | 23 (11)               | 16 (13)                 | .6  | 16 (14)                 | 5 (16)                  | .8   |
| Overweight (BMI≥25)                         | 129 (63)              | 60 (50)                 | .02 | 81 (72)                 | 16 (52)                 | .04  |
| Atrial fibrillation                         | 33 (16)               | 13 (11)                 | .2  | 13 (12)                 | 2 (6)                   | .4   |
| Hypercholesteroaemia                        | 98 (48)               | 53 (44)                 | .5  | 64 (57)                 | 16 (52)                 | .6   |
| Smoking <sup>b</sup>                        | 72 (35)               | 42 (35)                 | 1   | 51 (50)                 | 14 (45)                 | 1    |
| 10-words learning task <sup>c</sup>         | 12 (6)                | 5 (5)                   | .6  | 7 (6)                   | 2 (6)                   | 1    |
| 10-words learning task delayed <sup>d</sup> | 18 (10)               | 4 (4)                   | .08 | 10 (9)                  | 2 (6)                   | .7   |
| Verbal Fluency <sup>e</sup>                 | 25 (13)               | 7 (7)                   | .09 | 14 (12)                 | 3 (10)                  | .7   |
| Trail-making A <sup>f</sup>                 | 10 (5)                | 5 (5)                   | .9  | 2 (2)                   | 2 (7)                   | .1   |
| Trail-making B <sup>f</sup>                 | 22 (12)               | 11 (11)                 | .8  | 13 (12)                 | 3 (10)                  | .8   |
| <b>Color-Word Interference tests</b>        |                       |                         |     |                         |                         |      |
| Color-word naming <sup>g</sup>              | 39 (21)               | 18 (18)                 | .5  | 16 (14)                 | 4 (13)                  | .9   |
| Color-word reading <sup>g</sup>             | 32 (17)               | 20 (20)                 | .6  | 14 (12)                 | 3 (10)                  | .7   |
| Color-word inhibition <sup>e</sup>          | 30 (16)               | 8 (8)                   | .05 | 17 (15)                 | 3 (10)                  | .4   |
| Color-word inhib/switch Error scores        | 43 (23)               | 15 (15)                 | .1  | 1 (1)                   | 1 (3)                   | .3   |
| Color naming error <sup>f</sup>             | 10 (5)                | 5 (5)                   | .9  | 5 (4)                   | 0 (0)                   | .2   |
| Reading error <sup>f</sup>                  | 22 (12)               | 7 (7)                   | .2  | 15 (13)                 | 2 (6)                   | .3   |
| Inhibition error <sup>f</sup>               | 9 (5)                 | 8 (8)                   | .3  | 4 (4)                   | 2 (6)                   | .5   |
| Inhibition/switching error <sup>f</sup>     | 18 (10)               | 7 (7)                   | .4  | 7 (6)                   | 1 (3)                   | .5   |
| Impairment ≥2 cogn tests                    | 69 (38)               | 29 (29)                 | .2  | 94 (83)                 | 28 (90)                 | .3   |
| <b>Questionnaires</b>                       |                       |                         |     |                         |                         |      |
| HADS <sup>g</sup>                           | 31 (18)               | 14 (14)                 | .4  | 0                       | 0                       |      |

|                           |         |         |     |         |        |     |
|---------------------------|---------|---------|-----|---------|--------|-----|
| <i>HADS-A<sup>h</sup></i> | 33 (19) | 19 (19) | 1.0 | 12 (11) | 7 (24) | .06 |
| <i>HADS-D<sup>h</sup></i> | 26 (15) | 8 (8)   | .09 | 7 (6)   | 2 (7)  | .9  |
| <i>FSS<sup>i</sup></i>    | 52 (29) | 30 (31) | .8  | 14 (13) | 7 (24) | .1  |

\*Prevalence at baseline, no of male patients 204, female patients 120.<sup>a</sup> Hypercholesterolemia is defined as treatment with cholesterol lowering medication, <sup>b</sup>Smoking is defined as current smoker or smoking within the last 12 months.<sup>c</sup> Adjusted for age and educational level,<sup>d</sup> tested with 5 minutes delay,<sup>e</sup> scaled score, <sup>f</sup> cumulative percentage. <sup>g</sup> Anxiety and/or depression defined as HADS  $\geq 15$ , <sup>f</sup> anxiety was defined as HADS-A $\geq 8$ , and <sup>f</sup> depression as HADS-D $\geq 8$ . <sup>i</sup> Fatigue defined as FSS  $\geq 5$ .

Missing values in some of variables. No of female patients 97-102 male patients 172-186, no of female controls 28-31 male controls 109-113.

**Table ii. Linear regression analyses with cognitive tests as dependent variables showing beta values for all independent variables (beta).**

|                                                   | <i>Age</i>                 | <i>Males</i>                  | <i>Ischemic stroke vs NSTEMI</i> | <i>Higher education</i> | <i>Marital stage</i> | <i>Hypertension</i> | <i>Diabetes mellitus</i> | <i>Overweight</i> |
|---------------------------------------------------|----------------------------|-------------------------------|----------------------------------|-------------------------|----------------------|---------------------|--------------------------|-------------------|
| <i>10-words learning task<sup>a</sup></i>         | -.1                        | -.15*                         | -.04                             | .16*                    | .01                  | -.09                | .01                      | -.004             |
| <i>10-words learning task-delayed<sup>b</sup></i> | -.16*                      | -.12*                         | -.28*                            | .12*                    | -.01                 | -.02                | -.04                     | -.02              |
| <i>Trail-making A<sup>c</sup></i>                 | -.03                       | .02                           | -.08                             | .33*                    | -.03                 | -.05                | -.06                     | -.03              |
| <i>Trail-making B<sup>c</sup></i>                 | -.01                       | -.04                          | -.12                             | .33*                    | -.04                 | -.1                 | -.03                     | -.05              |
| <i>Verbal fluency<sup>c</sup></i>                 | -.12*                      | -.05                          | .04                              | .29*                    | .02                  | .11                 | -.06                     | .15               |
| <b>Color-word interference tests</b>              |                            |                               |                                  |                         |                      |                     |                          |                   |
| <i>Color naming<sup>c</sup></i>                   | .07                        | -.1                           | -.14                             | .21*                    | -.03                 | .02                 | -.02                     | -.03              |
| <i>Color reading<sup>c</sup></i>                  | .1                         | .01                           | -.11                             | .27*                    | -.004                | -.03                | -.02                     | .01               |
| <i>Color inhibition<sup>c</sup></i>               | .02                        | -.08                          | -.11                             | .28*                    | .04                  | .04                 | -.12*                    | .05               |
| <i>Color inhibition/switching<sup>c</sup></i>     | .03                        | -.07                          | -.11                             | .29*                    | .04                  | .04                 | -.1                      | .02               |
| <b>Error scores<sup>d</sup></b>                   |                            |                               |                                  |                         |                      |                     |                          |                   |
| <i>Naming errors<sup>d</sup></i>                  | -.14*                      | .01                           | -.04                             | .02                     | .09                  | .02                 | .04                      | .06               |
| <i>Reading errors</i>                             | -.03                       | -.12*                         | .02                              | .04                     | -.15*                | .02                 | .07                      | .09               |
| <i>Inhibition errors<sup>c</sup></i>              | -.12                       | .07                           | .05                              | -.05                    | -.05                 | -.7                 | -.03                     | .22*              |
| <i>Inhibition/switching errors<sup>c</sup></i>    | .08                        | -.06                          | .02                              | .15*                    | .03                  | .07                 | -.07                     | .11               |
| <i>Number of cogn test impairment</i>             | .02                        | .05                           | .12                              | -.25*                   | .06                  | .05                 | .05                      | -.01              |
|                                                   | <i>Atrial fibrillation</i> | <i>Hyper-cholesterolaemia</i> | <i>Smoking</i>                   | <i>HADS</i>             | <i>HAD-A</i>         | <i>HAD-D</i>        | <i>FSS</i>               |                   |
| <i>10-words learning task<sup>a</sup></i>         | .02                        | -.08                          | -.02                             | -.15-                   | .1                   | -.07                | -.05                     |                   |
| <i>10-words learning task-delayed<sup>b</sup></i> | .08                        | -.09                          | -.04                             | .04                     | .04                  | -.11                | -.09                     |                   |
| <i>Trail-making A<sup>c</sup></i>                 | .06                        | .07                           | -.04                             | .07                     | .02                  | -.07                | -.06                     |                   |
| <i>Trail-making B<sup>c</sup></i>                 | .03                        | .04                           | -.02                             | -.18                    | .07                  | -.06                | .02                      |                   |

|                                                |      |      |      |      |       |       |      |
|------------------------------------------------|------|------|------|------|-------|-------|------|
| <i>Verbal fluency<sup>c</sup></i>              | .01  | -.04 | -.06 | -.1  | .08   | -.05  | -.06 |
| <b>Color-word interference tests</b>           |      |      |      |      |       |       |      |
| <i>Color naming<sup>c</sup></i>                | -.04 | -.04 | -.01 | .07  | .01   | -.27* | -.03 |
| <i>Color reading<sup>c</sup></i>               | .03  | -.02 | .02  | .03  | .05   | -.12  | -.04 |
| <i>Color inhibition<sup>c</sup></i>            | -.02 | -.03 | -.04 | .12  | -.04  | -.22* | -.03 |
| <i>Color inhibition/switching<sup>c</sup></i>  | -.02 | -.04 | -.03 | .12  | -.03* | -.23  | -.04 |
| <b>Error scores<sup>d</sup></b>                |      |      |      |      |       |       |      |
| <i>Naming errors<sup>d</sup></i>               | .08  | -.06 | -.01 | .13  | -.05  | -.2*  | .06  |
| <i>Reading errors</i>                          | .09  | -.08 | .08  | .05  | -.03  | .01   | -.04 |
| <i>Inhibition errors<sup>c</sup></i>           | .02  | .1   | .04  | -.07 | .07   | -.08  | -.03 |
| <i>Inhibition/switching errors<sup>c</sup></i> | -.07 | -.01 | -.07 | -.03 | .09   | -.07  | -.06 |
| <i>Number of cogn test impairment</i>          | -.01 | .05  | -.02 | .1   | -.17* | .26*  | .01  |

\*Not adjusted for age and educational level in a linear model, <sup>b</sup>tested with 5 minutes delay, <sup>c</sup>scaled score adjusted for age, <sup>d</sup>cumulative adjusted for age percentage. Significant difference with normative data is labeled with\*.
